# Supplementary material
Source: publisher figshare collection journal article supplement (https://tandf.figshare.com/ndownloader/files/10609042)
Supplement: Supplementary file 1 [file 10609042]

**Supplementary Table 1. Peripheral blood diagnostic protein biomarkers reported for MDD and BD and an example of their main biological processes.**

Biological processes of proteins derived from UniProt database (UniProt99: the universal protein knowledgebase; Accessed last: January 2018).

MDD: major depressive disorder; BD: bipolar disorder.

| **Accession** | **Entry Name** | **Protein** | **Example of Biological Processes** |
| --- | --- | --- | --- |
| P63261 | ACTG_HUMAN | Actin, cytoplasmic 2 | cell junction assembly; receptor signalling pathway; membrane organization; movement of cell or subcellular component ; platelet aggregation |
| Q15109 | RAGE_HUMAN | Advanced glycosylation end product-specific receptor | astrocyte development; receptor signalling pathway; chemotaxis; inflammatory response; immune response |
| P43652 | AFAM_HUMAN | Afamin | vitamin transport |
| P02768 | ALBU_HUMAN | Serum albumin | bile acid and bile salt transport; cellular protein metabolic process |
| P02763 | A1AG1_HUMAN | Alpha-1-acid glycoprotein 1 | acute-phase response; inflammatory response |
| P01011 | AACT_HUMAN | Alpha-1-antichymotrypsin | acute-phase response; inflammatory response |
| P01009 | A1AT_HUMAN | Alpha-1-antitrypsin | acute-phase response; blood coagulation |
| P04217 | A1BG_HUMAN | Alpha-1B-glycoprotein | neutrophil degranulation; platelet degranulation |
| P02765 | FETUA_HUMAN | Alpha-2-HS-glycoprotein | acute-phase response; cellular protein metabolic process |
| P02765 | FETUA_HUMAN | Alpha-2-HS-glycoprotein isoform CRA_b | acute-phase response; cellular protein metabolic process |
| P01023 | A2MG_HUMAN | Alpha-2-macroglobulin | blood coagulation, intrinsic pathway; extracellular matrix disassembly |
| P03950 | ANGI_HUMAN | Angiogenin | actin filament polymerization; activation of phospholipase A2 activity; activation of phospholipase C activity; activation of protein kinase B activity; adherens junction organization |
| O15123 | ANGP2_HUMAN | Angiopoietin-2 | angiogenesis; germ cell development; glomerulus vasculature development; leukocyte migration |
| Q9Y5C1 | ANGL3_HUMAN | Angiopoietin-related protein 3 | acylglycerol homeostasis; angiogenesis; artery morphogenesis; cholesterol homeostasis; cholesterol metabolic process |
| P12821 | ACE_HUMAN | Angiotensin-converting enzyme | amyloid-beta metabolic process; angiotensin catabolic process in blood; angiotensin maturation |
| P01019 | ANGT_HUMAN | Angiotensinogen | aging ; angiotensin-activated signalling pathway ; angiotensin maturation |
| P03973 | SLPI_HUMAN | Antileukoproteinase | antibacterial humoral response ; immune response ; innate immune response |
| P01008 | ANT3_HUMAN | Antithrombin-III | acute inflammatory response; blood coagulation ; cellular protein metabolic process |
| P02647 | APOA1_HUMAN | Apolipoprotein A-I | adrenal gland development ; blood vessel endothelial cell migration ; cellular protein metabolic process ; cholesterol biosynthetic process |
| P02652 | APOA2_HUMAN | Apolipoprotein A-II | acute inflammatory response ; cellular protein metabolic process ; cholesterol efflux ; cholesterol homeostasis ; cholesterol metabolic process |
| P06727 | APOA4_HUMAN | Apolipoprotein A-IV | cellular protein metabolic process ; cholesterol biosynthetic process ; cholesterol efflux ; cholesterol homeostasis ; cholesterol metabolic process |
| P06727 | APOA4_HUMAN | Apolipoprotein A-IV precursor | cellular protein metabolic process ; cholesterol biosynthetic process ; cholesterol efflux ; cholesterol homeostasis ; cholesterol metabolic process |
| P04114 | APOB_HUMAN | Apolipoprotein B-100 | artery morphogenesis ; cellular protein metabolic process ; cholesterol efflux ; cholesterol homeostasis |
| P02654 | APOC1_HUMAN | Apolipoprotein C-I | cholesterol metabolic process ; chylomicron remnant clearance ; high-density lipoprotein particle remodelling ; lipid metabolic process ; lipoprotein metabolic process |
| P02656 | APOC3_HUMAN | Apolipoprotein C-III | cholesterol homeostasis ; chylomicron assembly ;G-protein coupled receptor signalling pathway ; high-density lipoprotein particle remodelling |
| P05090 | APOD_HUMAN | Apolipoprotein D | aging ; angiogenesis ; brain development ; glucose metabolic process ; lipid metabolic process ;inflammatory response |
| P02649 | APOE_HUMAN | Apolipoprotein E | AMPA glutamate receptor clustering ; amyloid precursor protein metabolic process ; artery morphogenesis ; cellular calcium ion homeostasis ; cellular protein metabolic process; cholesterol homeostasis |
| O14791 | APOL1_HUMAN | Apolipoprotein L1 | cellular protein metabolic process ; chloride transmembrane transport ; cholesterol metabolic process ; cytolysis ; innate immune response ; lipid transport ; lipoprotein metabolic process ; post-translational protein modification ; receptor-mediated endocytosis |
| P08519 | APOA_HUMAN | Apolipoprotein(a) | blood circulation ; lipid metabolic process ; lipid transport |
| P23560 | BDNF_HUMAN | Brain-derived neurotrophic factor | axon guidance ; brain-derived neurotrophic factor receptor signalling pathway ; cell-cell signalling |
| Q99616 | CCL13_HUMAN | C-C motif chemokine 13 | immune response ; cell-cell signalling ; cellular calcium ion homeostasis ; chemotaxis ; cytoskeleton organization ; inflammatory response |
| O15467 | CCL16_HUMAN | C-C motif chemokine 16 | cell-cell signalling ; chemotaxis ; inflammatory response |
| P13500 | CCL2_HUMAN | C-C motif chemokine 2 | aging ; angiogenesis ; cell adhesion ; cell surface receptor signalling pathway ; cellular calcium ion homeostasis ; cellular homeostasis ; chemotaxis ; chronic inflammatory response |
| P78556 | CCL20_HUMAN | C-C motif chemokine 20 | immune response ; calcium-mediated signalling using intracellular calcium source ; cell-cell signalling ; cell chemotaxis |
| O00626 | CCL22_HUMAN | C-C motif chemokine 22 | antimicrobial humoral immune response mediated by antimicrobial peptide ; cell-cell signalling ; cellular response to interferon-gamma; cell chemotaxis |
| Q9Y258 | CCL26_HUMAN | C-C motif chemokine 26 | cell-cell signalling ; chemotaxis ; signal transduction |
| P13236 | CCL4_HUMAN | C-C motif chemokine 4 | cell adhesion ; cell-cell signalling ; immune response ; inflammatory response |
| P80075 | CCL8_HUMAN | C-C motif chemokine 8 | Immune response; calcium ion transport ; cell-cell signalling; chemotaxis ; exocytosis ; inflammatory response ; signal transduction |
| P02741 | CRP_HUMAN | C-reactive protein | acute-phase response; inflammatory response ; |
| Q9UBG0 | MRC2_HUMAN | C-type mannose receptor 2 | collagen catabolic process ; endocytosis ; osteoblast differentiation |
| P04003 | C4BPA_HUMAN | C4b-binding protein alpha chain | complement activation, classical pathway ; innate immune response ; negative regulation of complement activation, classical pathway |
| P04003 | C4BPA_HUMAN | C4b-binding protein alpha chain isoform | complement activation, classical pathway ; innate immune response ; negative regulation of complement activation, classical pathway |
| P05937 | CALB1_HUMAN | Calbindin | cellular protein metabolic process |
|  |  | Cancer antigen 19-9 (CA 19-9) |  |
| P00915 | CAH1_HUMAN | Carbonic anhydrase 1 | bicarbonate transport ; interleukin-12-mediated signalling pathway ; one-carbon metabolic process |
| Q96IY4 | CBPB2_HUMAN | Carboxypeptidase B2 | blood coagulation ; cellular response to glucose stimulus ; fibrinolysis; proteolysis |
| Q7Z692 | CEA19_HUMAN | Carcinoembryonic antigen |  |
| P15169 | CBPN_HUMAN | Carboxypeptidase N catalytic chain | bradykinin catabolic process ; insulin processing ; regulation of complement activation ; response to glucocorticoid |
| P07339 | CATD_HUMAN | Cathepsin D | antigen processing and presentation of exogenous peptide antigen via MHC class II ; autophagy ; collagen catabolic process ; neutrophil degranulation ; protein catabolic process ; proteolysis |
| P29965 | CD40L_HUMAN | CD40 ligand | activation of JUN kinase activity ; B cell differentiation ; B cell proliferation ; immunoglobulin secretion ; inflammatory response |
| O43866 | CD5L_HUMAN | CD5 antigen-like | apoptotic process ; cellular defence response ; immune system process ; inflammatory response |
| B4E1B2 | B4E1B2_HUMAN | cDNA FLJ53691, highly similar to Serotransferrin | cellular iron ion homeostasis |
| B2RAN2 | B2RAN2_HUMAN | cDNA, FLJ95014, highly similar to Homo sapiens vanin 1 (VNN1), mRNA | nitrogen compound metabolic process |
| P00450 | CERU_HUMAN | Ceruloplasmin | cellular iron ion homeostasis ; cellular protein metabolic process ; copper ion transport ; post-translational protein modification |
| P02747 | C1QC_HUMAN | Complement C1q subcomponent subunit C | complement activation ; complement activation, classical pathway ; immune response |
| P00736 | C1R_HUMAN | Complement C1r subcomponent | complement activation ; complement activation, classical pathway ; immune response |
| P01024 | CO3_HUMAN | Complement C3 | amyloid-beta clearance ; cellular protein metabolic process ; complement activation ; complement activation, alternative pathway ; complement activation, classical pathway ; immune response ; inflammatory response; signal transduction |
|  |  | Complement C4 gamma chain |  |
| P0C0L4 | CO4A_HUMAN | Complement C4-A | cellular protein metabolic process ; complement activation ; complement activation, classical pathway ; inflammatory response ;immune response |
| P0C0L5 | CO4B_HUMAN | Complement C4-B | complement activation ; inflammatory response ; immune response |
| V9H0D6 | V9H0D6_HUMAN | Complement C4A3 |  |
| A0A024R035 | A0A024R035_HUMAN | Complement component 9, isoform CRA_a | immune response |
| Q03591 | FHR1_HUMAN | Complement factor H-related protein 1 | complement activation ;protein binding |
| P05156 | CFAI_HUMAN | Complement factor I | complement activation, classical pathway ; immune response |
| P05156 | CFAI_HUMAN | Complement factor I heavy chain | complement activation, classical pathway ; immune response |
| P29279 | CTGF_HUMAN | Connective tissue growth factor | aging ; angiogenesis ; cartilage condensation ; cell adhesion ; cell-cell signalling ; cell differentiation ; cell-matrix adhesion ; cell migration |
|  |  | Cortisol |  |
|  |  | Creatine kinase MB |  |
| P01034 | CYTC_HUMAN | Cystatin-C | apoptotic process ; brain development ; cellular protein metabolic process |
| Q5T9B9 | Q5T9B9_HUMAN | Endoglin |  |
| P05305 | EDN1_HUMAN | Endothelin-1 | artery smooth muscle contraction ; body fluid secretion ; blood vessel morphogenesis ; calcium-mediated signalling ; cartilage development ; cell-cell signalling |
| P15090 | FABP4_HUMAN | Fatty acid-binding protein, adipocyte | brown fat cell differentiation ; cellular response to lithium ion ; cellular response to tumour necrosis factor ; cholesterol homeostasis ; cytokine production ; transcription; inflammatory response |
|  |  | Factor VII |  |
|  |  | Ferritin |  |
| P02671 | FIBA_HUMAN | Fibrinogen alpha chain | Immune response ; blood coagulation ; immune response |
| P02675 | FIBB_HUMAN | Fibrinogen beta chain | Immune response ; blood coagulation ; cell-matrix adhesion |
| P02679 | FIBG_HUMAN | Fibrinogen gamma chain | blood coagulation ; cell-matrix adhesion |
| D3DP16 | D3DP16_HUMAN | Fibrinogen gamma chain, isoform CRA_a | platelet activation ; protein polymerization ; signal transduction |
| P09038 | FGF2_HUMAN | Fibroblast growth factor 2 | activation of MAPK activity ; signal transduction |
| P08263 | GSTA1_HUMAN | Glutathione S-transferase A1 | cell differentiation ; metabolic process |
| P08263 | GSTA1_HUMAN | Glutathione S-transferase alpha | cell differentiation ; metabolic process |
|  |  | Follicle-stimulating hormone |  |
| P09919 | CSF3_HUMAN | Granulocyte colony-stimulating factor | cytokine-mediated signalling pathway ; granulocyte differentiation ; immune response |
| P09341 | GROA_HUMAN | Growth-regulated alpha protein | actin cytoskeleton organization ; immune response; cell proliferation ; chemokine-mediated signalling pathway ; chemotaxis; signal transduction |
| Q99988 | GDF15_HUMAN | Growth/differentiation factor 15 | cell-cell signalling ; cell development ; regulation of myoblast fusion; regulation of apoptotic process ; signal transduction; receptor signalling pathway |
| P00738 | HPT_HUMAN | Haptoglobin | acute-phase response ; defence response ; negative regulation of hydrogen peroxide catabolic process ; regulation of oxidoreductase activity ; neutrophil degranulation ; positive regulation of cell death |
| P00739 | HPTR_HUMAN | Haptoglobin-related protein | receptor-mediated endocytosis |
| Q03933 | HSF2_HUMAN | Heat shock factor protein 2 | positive regulation of transcription from RNA polymerase II promoter |
| P02790 | HEMO_HUMAN | Hemopexin | cellular iron ion homeostasis ; heme metabolic process |
| P02790 | HEMO_HUMAN | Hemopexin, isoform CRA_d |  |
| Q96D42 | HAVR1_HUMAN | Hepatitis A virus cellular receptor 1 | virus receptor activity |
| P14210 | HGF_HUMAN | Hepatocyte growth factor | activation of MAPK activity; cell chemotaxis ; cell morphogenesis |
| P04196 | HRG_HUMAN | Histidine-rich glycoprotein | angiogenesis ; immune response; chemotaxis ; fibrinolysis ; heme transport |
|  |  | Immunoglobulin A |  |
| Q86YZ3 | HORN_HUMAN | Hornerin | cell envelope organization ; establishment of skin barrier ; keratinization ; neutrophil degranulation |
| P01871 | IGHM_HUMAN | Immunoglobulin heavy constant mu | immune response |
|  |  | Immunoglobulin M |  |
| P01308 | INS_HUMAN | Insulin | acute-phase response ; alpha-beta T cell activation ; cell-cell signalling ; cellular protein metabolic process ; cognition ; ER to Golgi vesicle-mediated transport ; fatty acid homeostasis ; glucose homeostasis ; glucose metabolic process |
| P05019 | IGF1_HUMAN | Insulin-like growth factor I | activation of MAPK activity ; activation of protein kinase B activity ; bone maturation ; cell activation ; cell proliferation ; protein metabolic process ; DNA replication |
| P18065 | IBP2_HUMAN | Insulin-like growth factor-binding protein 2 | aging ; cellular protein metabolic process ; cellular response to hormone stimulus ; signal transduction |
| P24593 | IBP5_HUMAN | Insulin-like growth factor-binding protein 5 | aging ; cellular protein metabolic process ; cellular response to cAMP ; cellular response to organic cyclic compound ; female pregnancy ; glucose homeostasis ; glucose metabolic process |
| P19827 | ITIH1_HUMAN | Inter-alpha-trypsin inhibitor heavy chain H1 | hyaluronan metabolic process |
| Q14624 | ITIH4_HUMAN | Inter-alpha-trypsin inhibitor heavy chain H4 | acute-phase response ; hyaluronan metabolic process ; platelet degranulation ; response to cytokine |
| P01583 | IL1A_HUMAN | Interleukin-1 alpha | apoptotic process ; cell proliferation ; cellular response to heat ; immune response ; inflammatory response |
| P18510 | IL1RA_HUMAN | Interleukin-1 receptor antagonist protein | acute-phase response ; fever generation ; immune response ; insulin secretion ; lipid metabolic process |
| P22301 | IL10_HUMAN | Interleukin-10 | aging ; B cell differentiation ; B cell proliferation ; branching involved in labyrinthine layer morphogenesis ; cell-cell signalling |
| P20809 | IL11_HUMAN | Interleukin-11 | B cell differentiation ; cell-cell signalling ; fat cell differentiation ; megakaryocyte differentiation ; negative regulation of hormone secretion |
| P29460 | IL12B_HUMAN | Interleukin-12 subunit beta | cell cycle arrest ; cell migration ; cell proliferation ; immune response; inflammatory response |
| P35225 | IL13_HUMAN | Interleukin-13 | cell-cell signalling ; cellular response to cytokine stimulus ; immune response ; inflammatory response ; signal transduction |
| Q16552 | IL17_HUMAN | Interleukin-17A | apoptotic process ; cell-cell signalling ; cell death ; immune response ; inflammatory response ; |
| P08700 | IL3_HUMAN | Interleukin-3 | cell-cell signalling ; cytokine-mediated signalling pathway ; immune response ; MAPK cascade ; nervous system development ; positive regulation of cell proliferation ;DNA replication |
| P13232 | IL7_HUMAN | Interleukin-7 | cell-cell signalling ; homeostasis of number of cells within a tissue ; humoral immune response |
| P35527 | K1C9_HUMAN | Keratin, type I cytoskeletal 9 | cornification ; epidermis development ; intermediate filament organization ; keratinization ; skin development ; spermatogenesis |
| P04264 | K2C1_HUMAN | Keratin, type II cytoskeletal 1 | complement activation, lectin pathway ; fibrinolysis ; keratinization ; negative regulation of inflammatory response |
| B4E1C2 | B4E1C2_HUMAN | Kininogen 1, isoform CRA_b | cysteine-type endopeptidase inhibitor activity |
| P01042-2 | KNG1_HUMAN | Kininogen-1 isoform 2 precursor |  |
| P01042-3 | KNG1_HUMAN | Kininogen-1 isoform 3 precursor |  |
| P01042 | KNG1_HUMAN | Kininogen-1 | immune response; blood coagulation, intrinsic pathway ; cellular protein metabolic process ; inflammatory response |
| P21583 | SCF_HUMAN | Kit ligand | cell adhesion ; cell proliferation ; signal transduction |
| P47992 | XCL1_HUMAN | Lymphotactin | immune response; cell-cell signalling ; chemotaxis |
|  |  | Luteinizing hormone |  |
| P14174 | MIF_HUMAN | Macrophage migration inhibitory factor | carboxylic acid metabolic process ; cell aging ; cell proliferation; inflammatory response ; immune response |
| P11226 | MBL2_HUMAN | Mannose-binding protein C | acute-phase response ; complement activation |
| P09237 | MMP7_HUMAN | Matrilysin | aging ; cellular response to mechanical stimulus ; collagen catabolic process |
| P14780 | MMP9_HUMAN | Matrix metalloproteinase-9 | cellular response to cadmium ion ; cellular response to reactive oxygen species ; cell differentiation ; ephrin receptor signalling pathway ; extracellular matrix disassembly; macrophage differentiation ; negative regulation of apoptotic process ; negative regulation of cation channel activity |
| P14780 | MMP9_HUMAN | Matrix metalloproteinase-9 total | cellular response to cadmium ion ; cell differentiation ; ephrin receptor signalling pathway ; extracellular matrix disassembly; macrophage differentiation ; negative regulation of apoptotic process ; negative regulation of cation channel activity |
| Q8WXI7 | MUC16_HUMAN | Mucin-16 | cell adhesion ; O-glycan processing ; stimulatory C-type lectin receptor signalling pathway |
| P05164 | PERM_HUMAN | Myeloperoxidase | aging ; defence response ; defence response |
| P02144 | MYG_HUMAN | Myoglobin | brown fat cell differentiation ; enucleate erythrocyte differentiation ; heart development ; oxygen transport |
| Q96PD5 | PGRP2_HUMAN | N-acetylmuramoyl-L-alanine amidase | humoral response ; immune response ; peptide amidation ; catabolic process ; inflammatory response |
| Q8WXH0 | SYNE2_HUMAN | Nesprin-2 | centrosome localization ; cytoskeletal anchoring ; cell polarity ; fibroblast migration |
| P80188 | NGAL_HUMAN | Neutrophil gelatinase-associated lipocalin | humoral response ; cellular iron ion homeostasis ; immune response ; ion transport |
| P01298 | PAHO_HUMAN | Pancreatic prohormone | cell-cell signalling ; digestion ; G-protein coupled receptor signalling pathway ; neuropeptide signalling pathway ; protein secretion |
| P10082 | PYY_HUMAN | Peptide YY | cell-cell signalling ; cell proliferation ; cytoskeleton organization ; digestion ; feeding behaviour ; G-protein coupled receptor signalling pathway ; neuropeptide signalling pathway |
| P36955 | PEDF_HUMAN | Pigment epithelium-derived factor | aging ; cell proliferation ; multicellular organism development ; angiogenesis ; cell migration; inflammatory response ; neuron death ; neurogenesis ; short-term memory |
| P05121 | PAI1_HUMAN | Plasminogen activator inhibitor 1 | angiogenesis ; chronological cell aging ; circadian rhythm ; extracellular matrix organization ; fibrinolysis ; blood coagulation ;cell adhesion ; cell migration |
| P01127 | PDGFB_HUMAN | Platelet-derived growth factor subunit B | activation of protein kinase activity ; activation of protein kinase B activity ; cell chemotaxis ; cellular response to growth factor stimulus ; cellular response to mycophenolic acid ; embryonic placenta development ; extracellular matrix organization ; heart development ; interleukin-18-mediated signalling pathway ; MAPK cascade ; metanephric glomerular mesangial cell development ; monocyte chemotaxis ; negative regulation of gene expression |
| P01133 | EGF_HUMAN | Pro-epidermal growth factor | activation of MAPK activity ; activation of MAPKK activity ; angiogenesis ; branching morphogenesis of an epithelial tube ; canonical Wnt signalling pathway ; DNA replication ; ERBB2 signalling pathway ; ERK1 and ERK2 cascade ; MAPK cascade ; membrane organization ; platelet degranulation |
| Q14005 | IL16_HUMAN | Pro-interleukin-16 | immune response ; induction of positive chemotaxis ; leukocyte chemotaxis ; regulation of calcium ion transport ; regulation of transcription, DNA-templated ; transcription, DNA-templated ; viral process |
| P01189 | COLI_HUMAN | Pro-opiomelanocortin | immune response; cell-cell signalling ; cellular pigmentation ; generation of precursor metabolites and energy ; glucose homeostasis ; G-protein coupled receptor signalling pathway ; killing of cells of other organism |
| P07737 | PROF1_HUMAN | Profilin-1 | actin cytoskeleton organization ; cellular response to growth factor stimulus ; negative regulation of actin filament bundle assembly ; negative regulation of actin filament polymerization ; negative regulation of stress fiber assembly ; neural tube closure |
| P01236 | PRL_HUMAN | Prolactin (PRL) | cell proliferation ; cell surface receptor signalling pathway ; cellular protein metabolic process ; female pregnancy ; JAK-STAT cascade involved in growth hormone signalling pathway |
| Q16651 | PRSS8_HUMAN | Prostasin | cornification ; positive regulation of sodium ion transport |
| P80511 | S10AC_HUMAN | Protein S100-A12 | immune response; cytokine secretion; inflammatory response ; innate immune response ; killing of cells of other organism ; mast cell activation ; monocyte chemotaxis ; neutrophil chemotaxis |
|  |  | Progesterone |  |
| Q9BYX7 | ACTBM_HUMAN | Putative beta-actin-like protein 3 | platelet degranulation |
| P21860 | ERBB3_HUMAN | Receptor tyrosine-protein kinase erbB-3 | cranial nerve development ; endocardial cushion development ; ERBB2 signalling pathway ; extrinsic apoptotic signalling pathway in absence of ligand ; heart development ; MAPK cascade ; negative regulation of cell adhesion |
| Q9HD89 | RETN_HUMAN | Resistin | aging ; fat cell differentiation ; negative regulation of feeding behaviour ; neutrophil degranulation ; positive regulation of collagen metabolic process |
| P02753 | RET4_HUMAN | Retinol-binding protein 4 | cardiac muscle tissue development ; embryonic organ morphogenesis ; embryonic retina morphogenesis in camera-type eye ; embryonic skeletal system development |
| O75116 | ROCK2_HUMAN | Rho-associated protein kinase 2 | cellular response to testosterone stimulus ; centrosome duplication ; cortical actin cytoskeleton organization ; cytokinesis ; ephrin receptor signalling pathway ; G-protein coupled receptor signalling pathway ; I-kappaB kinase/NF-kappaB signalling ; negative regulation of angiogenesis |
| Q13275 | SEM3F_HUMAN | Semaphorin-3F | axon extension involved in axon guidance ; axon guidance ; branchiomotor neuron axon guidance ; facial nerve structural organization ; negative regulation of axon extension involved in axon guidance ; nerve development |
| P05981 | HEPS_HUMAN | Serine protease hepsin | basement membrane disassembly ; cochlea morphogenesis ; negative regulation of apoptotic process ; negative regulation of epithelial cell proliferation ; negative regulation of epithelial to mesenchymal transition; positive regulation by host of viral transcription ; positive regulation of cell growth |
| P02787 | TRFE_HUMAN | Serotransferrin | cellular iron ion homeostasis ; cellular protein metabolic process ; cellular response to iron ion ; ferrous iron import across plasma membrane ; iron ion homeostasis ; membrane organization |
| P0DJI8 | SAA1_HUMAN | Serum amyloid A-1 protein | activation of MAPK activity ; acute-phase response ; cellular protein metabolic process ; G-protein coupled receptor signalling pathway ; innate immune response ; lymphocyte chemotaxis ; macrophage chemotaxis ; negative regulation of inflammatory response ; |
| P02743 | SAMP_HUMAN | Serum amyloid P-component | acute-phase response ; cellular protein metabolic process |
| P02743 | SAMP_HUMAN | Serum amyloid P-component precursor | acute-phase response ; cellular protein metabolic process |
|  |  | Serum glutamic oxaloacetic transaminase |  |
| F8WF42 | F8WF42_HUMAN | Serum paraoxonase/arylesterase 1 | arylesterase activity |
| P04278 | SHBG_HUMAN | Sex hormone-binding globulin | androgen binding ; steroid binding |
| P01241 | SOMA_HUMAN | Somatotropin | bone maturation ; glucose transport ; growth hormone receptor signalling pathway |
| P08254 | MMP3_HUMAN | Stromelysin-1 | cellular response to nitric oxide ; collagen catabolic process ; extracellular matrix disassembly |
| P09238 | MMP10_HUMAN | Stromelysin-2 | collagen catabolic process ; extracellular matrix disassembly ; proteolysis ; regulation of cell migration |
| A0A087 x 176 | A0A087 x 176_HUMAN | Sulfhydryl oxidase |  |
| A0A087 | A0A087_9BURK | Protein RecA (Recombinase A) (Fragment) | DNA recombination ; DNA repair |
| P00441 | SODC_HUMAN | Superoxide dismutase | activation of MAPK activity ; anterograde axonal transport ; cell aging ; cellular iron ion homeostasis ; |
| Q6UWP8 | SBSN_HUMAN | Suprabasin |  |
| P06127 | CD5_HUMAN | T-cell surface glycoprotein CD5 | apoptotic signalling pathway ; cell proliferation ; cell recognition ; T cell costimulation |
| P24821 | TENA_HUMAN | Tenascin | cell adhesion ; cellular protein metabolic process ; extracellular matrix organization ; cell signalling ; neuromuscular junction development ; osteoblast differentiation ; axon regeneration ;cell proliferation |
| P40225 | TPO_HUMAN | Thrombopoietin | cell proliferation ; multicellular organism development ; myeloid cell differentiation ; positive regulation of ERK1 and ERK2 cascade |
| P05543 | THBG_HUMAN | Thyroxine-binding globulin | thyroid hormone transport |
|  |  | Testosterone |  |
| P02766 | TTHY_HUMAN | Transthyretin | cellular protein metabolic process ; extracellular matrix organization ; neutrophil degranulation ; retinoid metabolic process ; retinol metabolic process ; thyroid hormone transport ; transport |
|  |  | Thyroid-stimulating hormone |  |
| P01375 | TNFA_HUMAN | Tumour necrosis factor | activation of cysteine-type endopeptidase activity involved in apoptotic process ; activation of MAPK activity ; inflammatory response ; extracellular matrix organization ; extrinsic apoptotic signalling pathway ; glucose metabolic process ; immune response ; I-kappaB kinase/NF-kappaB signalling ; intrinsic apoptotic signalling ; JNK cascade |
| P48023 | TNFL6_HUMAN | Tumour necrosis factor ligand superfamily member 6 | activation of cysteine-type endopeptidase activity involved in apoptotic process ; activation of cysteine-type endopeptidase activity involved in apoptotic signalling pathway ; apoptotic process ; apoptotic signalling pathway ; cell-cell signalling ; signal transduction |
| O14798 | TR10C_HUMAN | Tumour necrosis factor receptor superfamily member 10C | apoptotic signalling pathway ; immune response ; inflammatory response ; cell proliferation ; response to lipopolysaccharide ; signal transduction |
| Q92956 | TNR14_HUMAN | Tumour necrosis factor receptor superfamily member 14 | apoptotic signalling pathway ; cell surface receptor signalling pathway ;; immune response ; inflammatory response ; multicellular organism development ; T cell migration ; apoptotic process ; regulation of cell proliferation ; response to lipopolysaccharide ; T cell co-stimulation ; tumour necrosis factor-mediated signalling pathway |
| P20333 | TNR1B_HUMAN | Tumour necrosis factor receptor superfamily member 1B | apoptotic signalling pathway ; cellular response to growth factor stimulus ; cellular response to lipopolysaccharide ; extrinsic apoptotic signalling pathway ; immune response ; inflammatory response |
| P25942 | TNR5_HUMAN | Tumour necrosis factor receptor superfamily member 5 | apoptotic signalling pathway ; B cell proliferation ; cellular calcium ion homeostasis |
| P30530 | UFO_HUMAN | Tyrosine-protein kinase receptor UFO | apoptotic cell clearance ; cell maturation ; cellular response to extracellular stimulus ; inflammatory response ; innate immune response |
| Q03405 | UPAR_HUMAN | Urokinase plasminogen activator surface receptor | attachment of GPI anchor to protein ; blood coagulation ; chemotaxis ; fibrinolysis ; signal transduction |
| P02774 | VTDB_HUMAN | Vitamin D-binding protein | vitamin D metabolic process |
| P02774-1 | VTDB_HUMAN | Vitamin D-binding protein isoform 1 | vitamin D metabolic process |
| P04004 | VTNC_HUMAN | Vitronectin | cell adhesion ; cell migration ; cell proliferation ; extracellular matrix organization ; immune response ; negative regulation of blood coagulation |
| P04275 | VWF_HUMAN | von Willebrand factor | blood coagulation ; cell adhesion; extracellular matrix organization ; haemostasis ; platelet activation |
